# Supplementary material
Source: PubMed Central journal article supplement (PMC10590538)
Supplement: NIHMS1932456-supplement-Appendix.pdf [file NIHMS1932456-supplement-Appendix.pdf]

# MAPP II Research Network Study Group

|                                                                                                                                                                                                                                                                                                                                                                                                                                                                                                                                                                                                                                                                                                                                                                                                                                                                                                                                                                                                                                                                                                                                                                                                                                                                                                                                                                                                                                                 |                                                                                                                                                                                                                                                                                                                                                                                                                                                                                                                                                                                                                                                                                                                                                                                                                                                                                                                                                                                                                                                                                                                                                                                                                                                                                                                                                                                                                                                                                                                                                                                                                                                                                                                                                                                                                                                                                                                                                                                                                                                                                                                                                                                                                                                                                                                                                                                                                                                                                                                                                                                                                                                                                                                                                                                                                                                                                                                                                                                                                                                                                                                                                                                                                                                                                                                                                                                                                                                                                                                                                                                                                                                                                                                                                                                                                                                                                                                                                                                                                                                                                                                                                                                                                                                                                                                                                                                                                                                                                                                                                                                                                                                                                                                                                                                                                                                                                                                                                                                                                             |                                                               |                        |                                 |                                          |                            |                     |                  |                     |                   |                   |                    |                   |                   |                   |             |                                     |                     |                        |                                          |                      |                        |                    |               |                          |                       |                  |                    |                    |  |  |                                      |                     |                     |                                |                          |                     |                  |                          |                   |                                      |                    |                           |                                 |                              |                             |                                            |                        |                     |                 |                      |                        |                             |                    |  |                         |  |  |                                     |                       |                      |                             |                 |                     |                           |                     |                       |                  |                  |                        |                  |                 |                    |                                         |                               |                                   |                                  |                                     |                            |                           |                    |                          |                                  |                     |                          |                             |                          |                        |                         |                    |                 |                                    |                          |                                                               |                         |                                          |                                   |                    |                                     |                   |                             |  |                   |                     |  |                   |                  |  |                     |                      |  |                    |                  |  |                     |                       |  |                       |               |  |                  |
|-------------------------------------------------------------------------------------------------------------------------------------------------------------------------------------------------------------------------------------------------------------------------------------------------------------------------------------------------------------------------------------------------------------------------------------------------------------------------------------------------------------------------------------------------------------------------------------------------------------------------------------------------------------------------------------------------------------------------------------------------------------------------------------------------------------------------------------------------------------------------------------------------------------------------------------------------------------------------------------------------------------------------------------------------------------------------------------------------------------------------------------------------------------------------------------------------------------------------------------------------------------------------------------------------------------------------------------------------------------------------------------------------------------------------------------------------|-----------------------------------------------------------------------------------------------------------------------------------------------------------------------------------------------------------------------------------------------------------------------------------------------------------------------------------------------------------------------------------------------------------------------------------------------------------------------------------------------------------------------------------------------------------------------------------------------------------------------------------------------------------------------------------------------------------------------------------------------------------------------------------------------------------------------------------------------------------------------------------------------------------------------------------------------------------------------------------------------------------------------------------------------------------------------------------------------------------------------------------------------------------------------------------------------------------------------------------------------------------------------------------------------------------------------------------------------------------------------------------------------------------------------------------------------------------------------------------------------------------------------------------------------------------------------------------------------------------------------------------------------------------------------------------------------------------------------------------------------------------------------------------------------------------------------------------------------------------------------------------------------------------------------------------------------------------------------------------------------------------------------------------------------------------------------------------------------------------------------------------------------------------------------------------------------------------------------------------------------------------------------------------------------------------------------------------------------------------------------------------------------------------------------------------------------------------------------------------------------------------------------------------------------------------------------------------------------------------------------------------------------------------------------------------------------------------------------------------------------------------------------------------------------------------------------------------------------------------------------------------------------------------------------------------------------------------------------------------------------------------------------------------------------------------------------------------------------------------------------------------------------------------------------------------------------------------------------------------------------------------------------------------------------------------------------------------------------------------------------------------------------------------------------------------------------------------------------------------------------------------------------------------------------------------------------------------------------------------------------------------------------------------------------------------------------------------------------------------------------------------------------------------------------------------------------------------------------------------------------------------------------------------------------------------------------------------------------------------------------------------------------------------------------------------------------------------------------------------------------------------------------------------------------------------------------------------------------------------------------------------------------------------------------------------------------------------------------------------------------------------------------------------------------------------------------------------------------------------------------------------------------------------------------------------------------------------------------------------------------------------------------------------------------------------------------------------------------------------------------------------------------------------------------------------------------------------------------------------------------------------------------------------------------------------------------------------------------------------------------------------------------------|---------------------------------------------------------------|------------------------|---------------------------------|------------------------------------------|----------------------------|---------------------|------------------|---------------------|-------------------|-------------------|--------------------|-------------------|-------------------|-------------------|-------------|-------------------------------------|---------------------|------------------------|------------------------------------------|----------------------|------------------------|--------------------|---------------|--------------------------|-----------------------|------------------|--------------------|--------------------|--|--|--------------------------------------|---------------------|---------------------|--------------------------------|--------------------------|---------------------|------------------|--------------------------|-------------------|--------------------------------------|--------------------|---------------------------|---------------------------------|------------------------------|-----------------------------|--------------------------------------------|------------------------|---------------------|-----------------|----------------------|------------------------|-----------------------------|--------------------|--|-------------------------|--|--|-------------------------------------|-----------------------|----------------------|-----------------------------|-----------------|---------------------|---------------------------|---------------------|-----------------------|------------------|------------------|------------------------|------------------|-----------------|--------------------|-----------------------------------------|-------------------------------|-----------------------------------|----------------------------------|-------------------------------------|----------------------------|---------------------------|--------------------|--------------------------|----------------------------------|---------------------|--------------------------|-----------------------------|--------------------------|------------------------|-------------------------|--------------------|-----------------|------------------------------------|--------------------------|---------------------------------------------------------------|-------------------------|------------------------------------------|-----------------------------------|--------------------|-------------------------------------|-------------------|-----------------------------|--|-------------------|---------------------|--|-------------------|------------------|--|---------------------|----------------------|--|--------------------|------------------|--|---------------------|-----------------------|--|-----------------------|---------------|--|------------------|
| <p><b>University of Pennsylvania<br/>Data Coordinating Core</b><br/><b>J. Richard Landis, PhD, Core Dir.</b><br/>Dina Appleby, MS<br/>Ted Barrell, BA<br/>Ro-Pauline Doe, BA<br/>John T. Farrar, MD, MSCE, PhD<br/>Melissa Fernando, MPH<br/>Laura Gallagher, MPH, CCRP<br/>Xiaoling Hou, MS<br/>Tamara Howard, MPH<br/>Thomas Jemielita, MS<br/>Natalie Kuzla, MA<br/>Kenneth Locke, Jr.<br/>Robert M. Moldwin, MD<br/>Craig Newcomb, MS<br/>Michel A. Pontari, MD<br/>Nancy Robinson-Garvin, PhD<br/>Sandra Smith, AS<br/>Alisa Stephens-Shields, PhD<br/>Sally Thompson, MS<br/>Yanli Wang, MS<br/>Xingmei Wang, MS</p> <p><b>University of Colorado Denver<br/>Tissue Analysis &amp; Technology Core</b><br/><b>M. Scott Lucia, MD, Core Dir.</b><br/><b>Adrie van Bokhoven, PhD, Co-Dir.</b><br/>Robert Dayton, Jr<br/>Oluwatosin Ibrahim, MS<br/>Andrea A. Osypuk, BS<br/>Hannah Schumann, BS<br/>Chelsea S. Triolo, BS<br/>R. Storey Wilson, MS</p> <p><b>National Institutes of Diabetes &amp;<br/>Digestive and Kidney Diseases</b><br/>Chris Mullins, PhD<br/>Tamara G. Bavendam, MD<br/>Ziya Kirkali, MD<br/>John W. Kusek, PhD</p> <p><b>MAPP Network Executive Committee</b><br/><b>J. Quentin Clemens, MD, FACS, MSci,<br/>Network Chair, 2013-</b><br/>J. Richard Landis, PhD<br/>M. Scott Lucia, MD<br/>Robert M. Moldwin, MD<br/>Michel A. Pontari, MD<br/>Chris Mullins, PhD<br/>Tamara Bavendam, MD<br/>Ziya Kirkali, MD</p> | <p style="text-align: center;"><u><b>DISCOVERY SITES</b></u></p> <p><b>Northwestern University</b></p> <table border="0"> <tr> <td><b>David J. Klumpp, PhD, Co-Dir.</b></td> <td>James W. Griffith, PhD</td> <td>Darlene S. Marko, RN, BSN, CCRC</td> </tr> <tr> <td><b>Anthony J. Schaeffer, MD, Co-Dir.</b></td> <td>Charles J. Heckman II, PhD</td> <td>Richard Miller, PhD</td> </tr> <tr> <td>Christina Arroyo</td> <td>Mingchen Jiang, PhD</td> <td>Todd Parrish, PhD</td> </tr> <tr> <td>Michael Bass, PhD</td> <td>Laurie Keefer, PhD</td> <td>Frank Tu, MD, MPH</td> </tr> <tr> <td>Sarah C Flury, MD</td> <td>Robert Lloyd, PhD</td> <td>Ryan Yaggie</td> </tr> </table> <p><b>University of California, Los Angeles / University of Southern California &amp; The PAIN Neuroimaging Core</b></p> <table border="0"> <tr> <td><b>Emeran A. Mayer, MD, Co-Dir.</b></td> <td>Nuwanthi Heendeniya</td> <td>Jennifer S. Labus, PhD</td> </tr> <tr> <td><b>Larissa V. Rodriguez, MD, Co-Dir.</b></td> <td>Lisa Kilpatrick, PhD</td> <td>Bruce D. Naliboff, PhD</td> </tr> <tr> <td>Jeffrey Alger, PhD</td> <td>Cara Kulbacki</td> <td>Suzanne R. Smith, RN, NP</td> </tr> <tr> <td>Cody P. Ashe-McNalley</td> <td>Jason Kutch, PhD</td> <td>Jeff Loh-Doyle, MD</td> </tr> <tr> <td>Ben Ellingson, PhD</td> <td></td> <td></td> </tr> </table> <p><b>University of Iowa</b></p> <table border="0"> <tr> <td><b>Karl J. Kreder, MD, MBA, Dir.</b></td> <td>Isabelle Hardy, MBA</td> <td>Stacy McMichael, BS</td> </tr> <tr> <td>Catherine S. Bradley, MD, MSCE</td> <td>Susan K. Lutgendorf, PhD</td> <td>Vince Magnotta, PhD</td> </tr> <tr> <td>Mary Eno, RN, RA</td> <td>Michael A. O'Donnell, MD</td> <td>Brad Erickson, MD</td> </tr> </table> <p><b>University of Michigan</b></p> <table border="0"> <tr> <td><b>Daniel J. Clauw, MD, Co-Dir.;</b></td> <td>Priyanka Gupta, MD</td> <td>Susanne Quallich, PhD, NP</td> </tr> <tr> <td><b>Network Chair, 2008-2013</b></td> <td>Megan E. Halvorson, BS, CCRP</td> <td>Katherine A. Scott, RN, BSN</td> </tr> <tr> <td><b>J. Quentin Clemens, MD, FACS, MSci,</b></td> <td>Richard E. Harris, PhD</td> <td>Andrew Schrepf, PhD</td> </tr> <tr> <td><b>Co-Dir.;</b></td> <td>Steven E. Harte, PhD</td> <td>David A. Williams, PhD</td> </tr> <tr> <td><b>Network Chair, 2013-</b></td> <td>Suzie As-Sanie, MD</td> <td></td> </tr> <tr> <td><b>Eric Ichesco, MD</b></td> <td></td> <td></td> </tr> </table> <p><b>Washington State University / University of Washington</b></p> <table border="0"> <tr> <td><b>Debra Buchwald, MD, WSU Dir.</b></td> <td>Kenneth Maravilla, MD</td> <td>Stephanie Richey, BS</td> </tr> <tr> <td>Eric Strachan, PhD, UW Dir.</td> <td>Jane Miller, MD</td> <td>Kelly Robertson, BS</td> </tr> <tr> <td>Niloofer Afari, PhD, UCSD</td> <td>Jean Kallhoff, ARNP</td> <td>Susan O. Ross, RN, MN</td> </tr> <tr> <td>Tamara Bacus, BS</td> <td>Cara Kulbaki, BS</td> <td>Suzette Sutherland, MD</td> </tr> <tr> <td>John Krieger, MD</td> <td>Swati Rane, PhD</td> <td>Claire C. Yang, MD</td> </tr> </table> <p><b>Washington University in St. Louis</b></p> <table border="0"> <tr> <td><b>Gerald L. Andriole, MD, Co-Dir..</b></td> <td>Jeffrey P. Henderson, MD, PhD</td> <td>Aleksandra P. Klim, RN, MHS, CCRC</td> </tr> <tr> <td><b>H. Henry Lai, MD, Co-Dir.</b></td> <td>Theresa M. Spitznagle, PT, DPT, WCS</td> <td>Vivien C. Gardner, RN, BSN</td> </tr> <tr> <td>Robert W. Gereau IV, PhD,</td> <td>Barry A. Hong, PhD</td> <td>Deborah Ksiazek, RN, BSN</td> </tr> <tr> <td>Siobhan Sutcliffe, PhD, ScM, MHS</td> <td>Akinkunle Owoso, MD</td> <td>Patricia Hayden, RN, BSN</td> </tr> <tr> <td>Graham A. Colditz, MD, DrPH</td> <td>Timothy J. Ness, MD, PhD</td> <td>Susan Mueller, RN, BSN</td> </tr> <tr> <td>Simon Haroutounian, PhD</td> <td>Georg Deutsch, PhD</td> <td>Maria Payne, BA</td> </tr> </table> <p style="text-align: center;"><u><b>NON-RECRUITING DISCOVERY SITES</b></u></p> <table border="0"> <tr> <td><b>Cedars-Sinai Medical Center</b></td> <td><b>Queens University</b></td> <td><b>Harvard Medical School/<br/>Boston Children's Hospital</b></td> </tr> <tr> <td>Jennifer Anger, MD, MPH</td> <td><b>J. Curtis Nickel, MD, FRCSC, Dir.</b></td> <td><b>Marsha A. Moses, PhD, Dir.</b></td> </tr> <tr> <td>James Ackerman, MA</td> <td>Garth D. Ehrlich, PhD, [Drexel COM]</td> <td>Andrew C. Briscoe</td> </tr> <tr> <td>A. Lenore Ackerman, MD, PhD</td> <td></td> <td>David Briscoe, MD</td> </tr> <tr> <td>Jeena Cha, BS, CCRP</td> <td></td> <td>Adam Curatolo, BA</td> </tr> <tr> <td>Karyn Eilber, MD</td> <td></td> <td>John Froehlich, PhD</td> </tr> <tr> <td>Michael Freeman, PhD</td> <td></td> <td>Richard S. Lee, MD</td> </tr> <tr> <td>Jayoung Kim, PhD</td> <td></td> <td>Monisha Sachdev, BS</td> </tr> <tr> <td>Jennifer Van Eyk, PhD</td> <td></td> <td>Keith R. Solomon, PhD</td> </tr> <tr> <td>Wei Yang, PhD</td> <td></td> <td>Hanno Steen, PhD</td> </tr> </table> | <b>David J. Klumpp, PhD, Co-Dir.</b>                          | James W. Griffith, PhD | Darlene S. Marko, RN, BSN, CCRC | <b>Anthony J. Schaeffer, MD, Co-Dir.</b> | Charles J. Heckman II, PhD | Richard Miller, PhD | Christina Arroyo | Mingchen Jiang, PhD | Todd Parrish, PhD | Michael Bass, PhD | Laurie Keefer, PhD | Frank Tu, MD, MPH | Sarah C Flury, MD | Robert Lloyd, PhD | Ryan Yaggie | <b>Emeran A. Mayer, MD, Co-Dir.</b> | Nuwanthi Heendeniya | Jennifer S. Labus, PhD | <b>Larissa V. Rodriguez, MD, Co-Dir.</b> | Lisa Kilpatrick, PhD | Bruce D. Naliboff, PhD | Jeffrey Alger, PhD | Cara Kulbacki | Suzanne R. Smith, RN, NP | Cody P. Ashe-McNalley | Jason Kutch, PhD | Jeff Loh-Doyle, MD | Ben Ellingson, PhD |  |  | <b>Karl J. Kreder, MD, MBA, Dir.</b> | Isabelle Hardy, MBA | Stacy McMichael, BS | Catherine S. Bradley, MD, MSCE | Susan K. Lutgendorf, PhD | Vince Magnotta, PhD | Mary Eno, RN, RA | Michael A. O'Donnell, MD | Brad Erickson, MD | <b>Daniel J. Clauw, MD, Co-Dir.;</b> | Priyanka Gupta, MD | Susanne Quallich, PhD, NP | <b>Network Chair, 2008-2013</b> | Megan E. Halvorson, BS, CCRP | Katherine A. Scott, RN, BSN | <b>J. Quentin Clemens, MD, FACS, MSci,</b> | Richard E. Harris, PhD | Andrew Schrepf, PhD | <b>Co-Dir.;</b> | Steven E. Harte, PhD | David A. Williams, PhD | <b>Network Chair, 2013-</b> | Suzie As-Sanie, MD |  | <b>Eric Ichesco, MD</b> |  |  | <b>Debra Buchwald, MD, WSU Dir.</b> | Kenneth Maravilla, MD | Stephanie Richey, BS | Eric Strachan, PhD, UW Dir. | Jane Miller, MD | Kelly Robertson, BS | Niloofer Afari, PhD, UCSD | Jean Kallhoff, ARNP | Susan O. Ross, RN, MN | Tamara Bacus, BS | Cara Kulbaki, BS | Suzette Sutherland, MD | John Krieger, MD | Swati Rane, PhD | Claire C. Yang, MD | <b>Gerald L. Andriole, MD, Co-Dir..</b> | Jeffrey P. Henderson, MD, PhD | Aleksandra P. Klim, RN, MHS, CCRC | <b>H. Henry Lai, MD, Co-Dir.</b> | Theresa M. Spitznagle, PT, DPT, WCS | Vivien C. Gardner, RN, BSN | Robert W. Gereau IV, PhD, | Barry A. Hong, PhD | Deborah Ksiazek, RN, BSN | Siobhan Sutcliffe, PhD, ScM, MHS | Akinkunle Owoso, MD | Patricia Hayden, RN, BSN | Graham A. Colditz, MD, DrPH | Timothy J. Ness, MD, PhD | Susan Mueller, RN, BSN | Simon Haroutounian, PhD | Georg Deutsch, PhD | Maria Payne, BA | <b>Cedars-Sinai Medical Center</b> | <b>Queens University</b> | <b>Harvard Medical School/<br/>Boston Children's Hospital</b> | Jennifer Anger, MD, MPH | <b>J. Curtis Nickel, MD, FRCSC, Dir.</b> | <b>Marsha A. Moses, PhD, Dir.</b> | James Ackerman, MA | Garth D. Ehrlich, PhD, [Drexel COM] | Andrew C. Briscoe | A. Lenore Ackerman, MD, PhD |  | David Briscoe, MD | Jeena Cha, BS, CCRP |  | Adam Curatolo, BA | Karyn Eilber, MD |  | John Froehlich, PhD | Michael Freeman, PhD |  | Richard S. Lee, MD | Jayoung Kim, PhD |  | Monisha Sachdev, BS | Jennifer Van Eyk, PhD |  | Keith R. Solomon, PhD | Wei Yang, PhD |  | Hanno Steen, PhD |
| <b>David J. Klumpp, PhD, Co-Dir.</b>                                                                                                                                                                                                                                                                                                                                                                                                                                                                                                                                                                                                                                                                                                                                                                                                                                                                                                                                                                                                                                                                                                                                                                                                                                                                                                                                                                                                            | James W. Griffith, PhD                                                                                                                                                                                                                                                                                                                                                                                                                                                                                                                                                                                                                                                                                                                                                                                                                                                                                                                                                                                                                                                                                                                                                                                                                                                                                                                                                                                                                                                                                                                                                                                                                                                                                                                                                                                                                                                                                                                                                                                                                                                                                                                                                                                                                                                                                                                                                                                                                                                                                                                                                                                                                                                                                                                                                                                                                                                                                                                                                                                                                                                                                                                                                                                                                                                                                                                                                                                                                                                                                                                                                                                                                                                                                                                                                                                                                                                                                                                                                                                                                                                                                                                                                                                                                                                                                                                                                                                                                                                                                                                                                                                                                                                                                                                                                                                                                                                                                                                                                                                                      | Darlene S. Marko, RN, BSN, CCRC                               |                        |                                 |                                          |                            |                     |                  |                     |                   |                   |                    |                   |                   |                   |             |                                     |                     |                        |                                          |                      |                        |                    |               |                          |                       |                  |                    |                    |  |  |                                      |                     |                     |                                |                          |                     |                  |                          |                   |                                      |                    |                           |                                 |                              |                             |                                            |                        |                     |                 |                      |                        |                             |                    |  |                         |  |  |                                     |                       |                      |                             |                 |                     |                           |                     |                       |                  |                  |                        |                  |                 |                    |                                         |                               |                                   |                                  |                                     |                            |                           |                    |                          |                                  |                     |                          |                             |                          |                        |                         |                    |                 |                                    |                          |                                                               |                         |                                          |                                   |                    |                                     |                   |                             |  |                   |                     |  |                   |                  |  |                     |                      |  |                    |                  |  |                     |                       |  |                       |               |  |                  |
| <b>Anthony J. Schaeffer, MD, Co-Dir.</b>                                                                                                                                                                                                                                                                                                                                                                                                                                                                                                                                                                                                                                                                                                                                                                                                                                                                                                                                                                                                                                                                                                                                                                                                                                                                                                                                                                                                        | Charles J. Heckman II, PhD                                                                                                                                                                                                                                                                                                                                                                                                                                                                                                                                                                                                                                                                                                                                                                                                                                                                                                                                                                                                                                                                                                                                                                                                                                                                                                                                                                                                                                                                                                                                                                                                                                                                                                                                                                                                                                                                                                                                                                                                                                                                                                                                                                                                                                                                                                                                                                                                                                                                                                                                                                                                                                                                                                                                                                                                                                                                                                                                                                                                                                                                                                                                                                                                                                                                                                                                                                                                                                                                                                                                                                                                                                                                                                                                                                                                                                                                                                                                                                                                                                                                                                                                                                                                                                                                                                                                                                                                                                                                                                                                                                                                                                                                                                                                                                                                                                                                                                                                                                                                  | Richard Miller, PhD                                           |                        |                                 |                                          |                            |                     |                  |                     |                   |                   |                    |                   |                   |                   |             |                                     |                     |                        |                                          |                      |                        |                    |               |                          |                       |                  |                    |                    |  |  |                                      |                     |                     |                                |                          |                     |                  |                          |                   |                                      |                    |                           |                                 |                              |                             |                                            |                        |                     |                 |                      |                        |                             |                    |  |                         |  |  |                                     |                       |                      |                             |                 |                     |                           |                     |                       |                  |                  |                        |                  |                 |                    |                                         |                               |                                   |                                  |                                     |                            |                           |                    |                          |                                  |                     |                          |                             |                          |                        |                         |                    |                 |                                    |                          |                                                               |                         |                                          |                                   |                    |                                     |                   |                             |  |                   |                     |  |                   |                  |  |                     |                      |  |                    |                  |  |                     |                       |  |                       |               |  |                  |
| Christina Arroyo                                                                                                                                                                                                                                                                                                                                                                                                                                                                                                                                                                                                                                                                                                                                                                                                                                                                                                                                                                                                                                                                                                                                                                                                                                                                                                                                                                                                                                | Mingchen Jiang, PhD                                                                                                                                                                                                                                                                                                                                                                                                                                                                                                                                                                                                                                                                                                                                                                                                                                                                                                                                                                                                                                                                                                                                                                                                                                                                                                                                                                                                                                                                                                                                                                                                                                                                                                                                                                                                                                                                                                                                                                                                                                                                                                                                                                                                                                                                                                                                                                                                                                                                                                                                                                                                                                                                                                                                                                                                                                                                                                                                                                                                                                                                                                                                                                                                                                                                                                                                                                                                                                                                                                                                                                                                                                                                                                                                                                                                                                                                                                                                                                                                                                                                                                                                                                                                                                                                                                                                                                                                                                                                                                                                                                                                                                                                                                                                                                                                                                                                                                                                                                                                         | Todd Parrish, PhD                                             |                        |                                 |                                          |                            |                     |                  |                     |                   |                   |                    |                   |                   |                   |             |                                     |                     |                        |                                          |                      |                        |                    |               |                          |                       |                  |                    |                    |  |  |                                      |                     |                     |                                |                          |                     |                  |                          |                   |                                      |                    |                           |                                 |                              |                             |                                            |                        |                     |                 |                      |                        |                             |                    |  |                         |  |  |                                     |                       |                      |                             |                 |                     |                           |                     |                       |                  |                  |                        |                  |                 |                    |                                         |                               |                                   |                                  |                                     |                            |                           |                    |                          |                                  |                     |                          |                             |                          |                        |                         |                    |                 |                                    |                          |                                                               |                         |                                          |                                   |                    |                                     |                   |                             |  |                   |                     |  |                   |                  |  |                     |                      |  |                    |                  |  |                     |                       |  |                       |               |  |                  |
| Michael Bass, PhD                                                                                                                                                                                                                                                                                                                                                                                                                                                                                                                                                                                                                                                                                                                                                                                                                                                                                                                                                                                                                                                                                                                                                                                                                                                                                                                                                                                                                               | Laurie Keefer, PhD                                                                                                                                                                                                                                                                                                                                                                                                                                                                                                                                                                                                                                                                                                                                                                                                                                                                                                                                                                                                                                                                                                                                                                                                                                                                                                                                                                                                                                                                                                                                                                                                                                                                                                                                                                                                                                                                                                                                                                                                                                                                                                                                                                                                                                                                                                                                                                                                                                                                                                                                                                                                                                                                                                                                                                                                                                                                                                                                                                                                                                                                                                                                                                                                                                                                                                                                                                                                                                                                                                                                                                                                                                                                                                                                                                                                                                                                                                                                                                                                                                                                                                                                                                                                                                                                                                                                                                                                                                                                                                                                                                                                                                                                                                                                                                                                                                                                                                                                                                                                          | Frank Tu, MD, MPH                                             |                        |                                 |                                          |                            |                     |                  |                     |                   |                   |                    |                   |                   |                   |             |                                     |                     |                        |                                          |                      |                        |                    |               |                          |                       |                  |                    |                    |  |  |                                      |                     |                     |                                |                          |                     |                  |                          |                   |                                      |                    |                           |                                 |                              |                             |                                            |                        |                     |                 |                      |                        |                             |                    |  |                         |  |  |                                     |                       |                      |                             |                 |                     |                           |                     |                       |                  |                  |                        |                  |                 |                    |                                         |                               |                                   |                                  |                                     |                            |                           |                    |                          |                                  |                     |                          |                             |                          |                        |                         |                    |                 |                                    |                          |                                                               |                         |                                          |                                   |                    |                                     |                   |                             |  |                   |                     |  |                   |                  |  |                     |                      |  |                    |                  |  |                     |                       |  |                       |               |  |                  |
| Sarah C Flury, MD                                                                                                                                                                                                                                                                                                                                                                                                                                                                                                                                                                                                                                                                                                                                                                                                                                                                                                                                                                                                                                                                                                                                                                                                                                                                                                                                                                                                                               | Robert Lloyd, PhD                                                                                                                                                                                                                                                                                                                                                                                                                                                                                                                                                                                                                                                                                                                                                                                                                                                                                                                                                                                                                                                                                                                                                                                                                                                                                                                                                                                                                                                                                                                                                                                                                                                                                                                                                                                                                                                                                                                                                                                                                                                                                                                                                                                                                                                                                                                                                                                                                                                                                                                                                                                                                                                                                                                                                                                                                                                                                                                                                                                                                                                                                                                                                                                                                                                                                                                                                                                                                                                                                                                                                                                                                                                                                                                                                                                                                                                                                                                                                                                                                                                                                                                                                                                                                                                                                                                                                                                                                                                                                                                                                                                                                                                                                                                                                                                                                                                                                                                                                                                                           | Ryan Yaggie                                                   |                        |                                 |                                          |                            |                     |                  |                     |                   |                   |                    |                   |                   |                   |             |                                     |                     |                        |                                          |                      |                        |                    |               |                          |                       |                  |                    |                    |  |  |                                      |                     |                     |                                |                          |                     |                  |                          |                   |                                      |                    |                           |                                 |                              |                             |                                            |                        |                     |                 |                      |                        |                             |                    |  |                         |  |  |                                     |                       |                      |                             |                 |                     |                           |                     |                       |                  |                  |                        |                  |                 |                    |                                         |                               |                                   |                                  |                                     |                            |                           |                    |                          |                                  |                     |                          |                             |                          |                        |                         |                    |                 |                                    |                          |                                                               |                         |                                          |                                   |                    |                                     |                   |                             |  |                   |                     |  |                   |                  |  |                     |                      |  |                    |                  |  |                     |                       |  |                       |               |  |                  |
| <b>Emeran A. Mayer, MD, Co-Dir.</b>                                                                                                                                                                                                                                                                                                                                                                                                                                                                                                                                                                                                                                                                                                                                                                                                                                                                                                                                                                                                                                                                                                                                                                                                                                                                                                                                                                                                             | Nuwanthi Heendeniya                                                                                                                                                                                                                                                                                                                                                                                                                                                                                                                                                                                                                                                                                                                                                                                                                                                                                                                                                                                                                                                                                                                                                                                                                                                                                                                                                                                                                                                                                                                                                                                                                                                                                                                                                                                                                                                                                                                                                                                                                                                                                                                                                                                                                                                                                                                                                                                                                                                                                                                                                                                                                                                                                                                                                                                                                                                                                                                                                                                                                                                                                                                                                                                                                                                                                                                                                                                                                                                                                                                                                                                                                                                                                                                                                                                                                                                                                                                                                                                                                                                                                                                                                                                                                                                                                                                                                                                                                                                                                                                                                                                                                                                                                                                                                                                                                                                                                                                                                                                                         | Jennifer S. Labus, PhD                                        |                        |                                 |                                          |                            |                     |                  |                     |                   |                   |                    |                   |                   |                   |             |                                     |                     |                        |                                          |                      |                        |                    |               |                          |                       |                  |                    |                    |  |  |                                      |                     |                     |                                |                          |                     |                  |                          |                   |                                      |                    |                           |                                 |                              |                             |                                            |                        |                     |                 |                      |                        |                             |                    |  |                         |  |  |                                     |                       |                      |                             |                 |                     |                           |                     |                       |                  |                  |                        |                  |                 |                    |                                         |                               |                                   |                                  |                                     |                            |                           |                    |                          |                                  |                     |                          |                             |                          |                        |                         |                    |                 |                                    |                          |                                                               |                         |                                          |                                   |                    |                                     |                   |                             |  |                   |                     |  |                   |                  |  |                     |                      |  |                    |                  |  |                     |                       |  |                       |               |  |                  |
| <b>Larissa V. Rodriguez, MD, Co-Dir.</b>                                                                                                                                                                                                                                                                                                                                                                                                                                                                                                                                                                                                                                                                                                                                                                                                                                                                                                                                                                                                                                                                                                                                                                                                                                                                                                                                                                                                        | Lisa Kilpatrick, PhD                                                                                                                                                                                                                                                                                                                                                                                                                                                                                                                                                                                                                                                                                                                                                                                                                                                                                                                                                                                                                                                                                                                                                                                                                                                                                                                                                                                                                                                                                                                                                                                                                                                                                                                                                                                                                                                                                                                                                                                                                                                                                                                                                                                                                                                                                                                                                                                                                                                                                                                                                                                                                                                                                                                                                                                                                                                                                                                                                                                                                                                                                                                                                                                                                                                                                                                                                                                                                                                                                                                                                                                                                                                                                                                                                                                                                                                                                                                                                                                                                                                                                                                                                                                                                                                                                                                                                                                                                                                                                                                                                                                                                                                                                                                                                                                                                                                                                                                                                                                                        | Bruce D. Naliboff, PhD                                        |                        |                                 |                                          |                            |                     |                  |                     |                   |                   |                    |                   |                   |                   |             |                                     |                     |                        |                                          |                      |                        |                    |               |                          |                       |                  |                    |                    |  |  |                                      |                     |                     |                                |                          |                     |                  |                          |                   |                                      |                    |                           |                                 |                              |                             |                                            |                        |                     |                 |                      |                        |                             |                    |  |                         |  |  |                                     |                       |                      |                             |                 |                     |                           |                     |                       |                  |                  |                        |                  |                 |                    |                                         |                               |                                   |                                  |                                     |                            |                           |                    |                          |                                  |                     |                          |                             |                          |                        |                         |                    |                 |                                    |                          |                                                               |                         |                                          |                                   |                    |                                     |                   |                             |  |                   |                     |  |                   |                  |  |                     |                      |  |                    |                  |  |                     |                       |  |                       |               |  |                  |
| Jeffrey Alger, PhD                                                                                                                                                                                                                                                                                                                                                                                                                                                                                                                                                                                                                                                                                                                                                                                                                                                                                                                                                                                                                                                                                                                                                                                                                                                                                                                                                                                                                              | Cara Kulbacki                                                                                                                                                                                                                                                                                                                                                                                                                                                                                                                                                                                                                                                                                                                                                                                                                                                                                                                                                                                                                                                                                                                                                                                                                                                                                                                                                                                                                                                                                                                                                                                                                                                                                                                                                                                                                                                                                                                                                                                                                                                                                                                                                                                                                                                                                                                                                                                                                                                                                                                                                                                                                                                                                                                                                                                                                                                                                                                                                                                                                                                                                                                                                                                                                                                                                                                                                                                                                                                                                                                                                                                                                                                                                                                                                                                                                                                                                                                                                                                                                                                                                                                                                                                                                                                                                                                                                                                                                                                                                                                                                                                                                                                                                                                                                                                                                                                                                                                                                                                                               | Suzanne R. Smith, RN, NP                                      |                        |                                 |                                          |                            |                     |                  |                     |                   |                   |                    |                   |                   |                   |             |                                     |                     |                        |                                          |                      |                        |                    |               |                          |                       |                  |                    |                    |  |  |                                      |                     |                     |                                |                          |                     |                  |                          |                   |                                      |                    |                           |                                 |                              |                             |                                            |                        |                     |                 |                      |                        |                             |                    |  |                         |  |  |                                     |                       |                      |                             |                 |                     |                           |                     |                       |                  |                  |                        |                  |                 |                    |                                         |                               |                                   |                                  |                                     |                            |                           |                    |                          |                                  |                     |                          |                             |                          |                        |                         |                    |                 |                                    |                          |                                                               |                         |                                          |                                   |                    |                                     |                   |                             |  |                   |                     |  |                   |                  |  |                     |                      |  |                    |                  |  |                     |                       |  |                       |               |  |                  |
| Cody P. Ashe-McNalley                                                                                                                                                                                                                                                                                                                                                                                                                                                                                                                                                                                                                                                                                                                                                                                                                                                                                                                                                                                                                                                                                                                                                                                                                                                                                                                                                                                                                           | Jason Kutch, PhD                                                                                                                                                                                                                                                                                                                                                                                                                                                                                                                                                                                                                                                                                                                                                                                                                                                                                                                                                                                                                                                                                                                                                                                                                                                                                                                                                                                                                                                                                                                                                                                                                                                                                                                                                                                                                                                                                                                                                                                                                                                                                                                                                                                                                                                                                                                                                                                                                                                                                                                                                                                                                                                                                                                                                                                                                                                                                                                                                                                                                                                                                                                                                                                                                                                                                                                                                                                                                                                                                                                                                                                                                                                                                                                                                                                                                                                                                                                                                                                                                                                                                                                                                                                                                                                                                                                                                                                                                                                                                                                                                                                                                                                                                                                                                                                                                                                                                                                                                                                                            | Jeff Loh-Doyle, MD                                            |                        |                                 |                                          |                            |                     |                  |                     |                   |                   |                    |                   |                   |                   |             |                                     |                     |                        |                                          |                      |                        |                    |               |                          |                       |                  |                    |                    |  |  |                                      |                     |                     |                                |                          |                     |                  |                          |                   |                                      |                    |                           |                                 |                              |                             |                                            |                        |                     |                 |                      |                        |                             |                    |  |                         |  |  |                                     |                       |                      |                             |                 |                     |                           |                     |                       |                  |                  |                        |                  |                 |                    |                                         |                               |                                   |                                  |                                     |                            |                           |                    |                          |                                  |                     |                          |                             |                          |                        |                         |                    |                 |                                    |                          |                                                               |                         |                                          |                                   |                    |                                     |                   |                             |  |                   |                     |  |                   |                  |  |                     |                      |  |                    |                  |  |                     |                       |  |                       |               |  |                  |
| Ben Ellingson, PhD                                                                                                                                                                                                                                                                                                                                                                                                                                                                                                                                                                                                                                                                                                                                                                                                                                                                                                                                                                                                                                                                                                                                                                                                                                                                                                                                                                                                                              |                                                                                                                                                                                                                                                                                                                                                                                                                                                                                                                                                                                                                                                                                                                                                                                                                                                                                                                                                                                                                                                                                                                                                                                                                                                                                                                                                                                                                                                                                                                                                                                                                                                                                                                                                                                                                                                                                                                                                                                                                                                                                                                                                                                                                                                                                                                                                                                                                                                                                                                                                                                                                                                                                                                                                                                                                                                                                                                                                                                                                                                                                                                                                                                                                                                                                                                                                                                                                                                                                                                                                                                                                                                                                                                                                                                                                                                                                                                                                                                                                                                                                                                                                                                                                                                                                                                                                                                                                                                                                                                                                                                                                                                                                                                                                                                                                                                                                                                                                                                                                             |                                                               |                        |                                 |                                          |                            |                     |                  |                     |                   |                   |                    |                   |                   |                   |             |                                     |                     |                        |                                          |                      |                        |                    |               |                          |                       |                  |                    |                    |  |  |                                      |                     |                     |                                |                          |                     |                  |                          |                   |                                      |                    |                           |                                 |                              |                             |                                            |                        |                     |                 |                      |                        |                             |                    |  |                         |  |  |                                     |                       |                      |                             |                 |                     |                           |                     |                       |                  |                  |                        |                  |                 |                    |                                         |                               |                                   |                                  |                                     |                            |                           |                    |                          |                                  |                     |                          |                             |                          |                        |                         |                    |                 |                                    |                          |                                                               |                         |                                          |                                   |                    |                                     |                   |                             |  |                   |                     |  |                   |                  |  |                     |                      |  |                    |                  |  |                     |                       |  |                       |               |  |                  |
| <b>Karl J. Kreder, MD, MBA, Dir.</b>                                                                                                                                                                                                                                                                                                                                                                                                                                                                                                                                                                                                                                                                                                                                                                                                                                                                                                                                                                                                                                                                                                                                                                                                                                                                                                                                                                                                            | Isabelle Hardy, MBA                                                                                                                                                                                                                                                                                                                                                                                                                                                                                                                                                                                                                                                                                                                                                                                                                                                                                                                                                                                                                                                                                                                                                                                                                                                                                                                                                                                                                                                                                                                                                                                                                                                                                                                                                                                                                                                                                                                                                                                                                                                                                                                                                                                                                                                                                                                                                                                                                                                                                                                                                                                                                                                                                                                                                                                                                                                                                                                                                                                                                                                                                                                                                                                                                                                                                                                                                                                                                                                                                                                                                                                                                                                                                                                                                                                                                                                                                                                                                                                                                                                                                                                                                                                                                                                                                                                                                                                                                                                                                                                                                                                                                                                                                                                                                                                                                                                                                                                                                                                                         | Stacy McMichael, BS                                           |                        |                                 |                                          |                            |                     |                  |                     |                   |                   |                    |                   |                   |                   |             |                                     |                     |                        |                                          |                      |                        |                    |               |                          |                       |                  |                    |                    |  |  |                                      |                     |                     |                                |                          |                     |                  |                          |                   |                                      |                    |                           |                                 |                              |                             |                                            |                        |                     |                 |                      |                        |                             |                    |  |                         |  |  |                                     |                       |                      |                             |                 |                     |                           |                     |                       |                  |                  |                        |                  |                 |                    |                                         |                               |                                   |                                  |                                     |                            |                           |                    |                          |                                  |                     |                          |                             |                          |                        |                         |                    |                 |                                    |                          |                                                               |                         |                                          |                                   |                    |                                     |                   |                             |  |                   |                     |  |                   |                  |  |                     |                      |  |                    |                  |  |                     |                       |  |                       |               |  |                  |
| Catherine S. Bradley, MD, MSCE                                                                                                                                                                                                                                                                                                                                                                                                                                                                                                                                                                                                                                                                                                                                                                                                                                                                                                                                                                                                                                                                                                                                                                                                                                                                                                                                                                                                                  | Susan K. Lutgendorf, PhD                                                                                                                                                                                                                                                                                                                                                                                                                                                                                                                                                                                                                                                                                                                                                                                                                                                                                                                                                                                                                                                                                                                                                                                                                                                                                                                                                                                                                                                                                                                                                                                                                                                                                                                                                                                                                                                                                                                                                                                                                                                                                                                                                                                                                                                                                                                                                                                                                                                                                                                                                                                                                                                                                                                                                                                                                                                                                                                                                                                                                                                                                                                                                                                                                                                                                                                                                                                                                                                                                                                                                                                                                                                                                                                                                                                                                                                                                                                                                                                                                                                                                                                                                                                                                                                                                                                                                                                                                                                                                                                                                                                                                                                                                                                                                                                                                                                                                                                                                                                                    | Vince Magnotta, PhD                                           |                        |                                 |                                          |                            |                     |                  |                     |                   |                   |                    |                   |                   |                   |             |                                     |                     |                        |                                          |                      |                        |                    |               |                          |                       |                  |                    |                    |  |  |                                      |                     |                     |                                |                          |                     |                  |                          |                   |                                      |                    |                           |                                 |                              |                             |                                            |                        |                     |                 |                      |                        |                             |                    |  |                         |  |  |                                     |                       |                      |                             |                 |                     |                           |                     |                       |                  |                  |                        |                  |                 |                    |                                         |                               |                                   |                                  |                                     |                            |                           |                    |                          |                                  |                     |                          |                             |                          |                        |                         |                    |                 |                                    |                          |                                                               |                         |                                          |                                   |                    |                                     |                   |                             |  |                   |                     |  |                   |                  |  |                     |                      |  |                    |                  |  |                     |                       |  |                       |               |  |                  |
| Mary Eno, RN, RA                                                                                                                                                                                                                                                                                                                                                                                                                                                                                                                                                                                                                                                                                                                                                                                                                                                                                                                                                                                                                                                                                                                                                                                                                                                                                                                                                                                                                                | Michael A. O'Donnell, MD                                                                                                                                                                                                                                                                                                                                                                                                                                                                                                                                                                                                                                                                                                                                                                                                                                                                                                                                                                                                                                                                                                                                                                                                                                                                                                                                                                                                                                                                                                                                                                                                                                                                                                                                                                                                                                                                                                                                                                                                                                                                                                                                                                                                                                                                                                                                                                                                                                                                                                                                                                                                                                                                                                                                                                                                                                                                                                                                                                                                                                                                                                                                                                                                                                                                                                                                                                                                                                                                                                                                                                                                                                                                                                                                                                                                                                                                                                                                                                                                                                                                                                                                                                                                                                                                                                                                                                                                                                                                                                                                                                                                                                                                                                                                                                                                                                                                                                                                                                                                    | Brad Erickson, MD                                             |                        |                                 |                                          |                            |                     |                  |                     |                   |                   |                    |                   |                   |                   |             |                                     |                     |                        |                                          |                      |                        |                    |               |                          |                       |                  |                    |                    |  |  |                                      |                     |                     |                                |                          |                     |                  |                          |                   |                                      |                    |                           |                                 |                              |                             |                                            |                        |                     |                 |                      |                        |                             |                    |  |                         |  |  |                                     |                       |                      |                             |                 |                     |                           |                     |                       |                  |                  |                        |                  |                 |                    |                                         |                               |                                   |                                  |                                     |                            |                           |                    |                          |                                  |                     |                          |                             |                          |                        |                         |                    |                 |                                    |                          |                                                               |                         |                                          |                                   |                    |                                     |                   |                             |  |                   |                     |  |                   |                  |  |                     |                      |  |                    |                  |  |                     |                       |  |                       |               |  |                  |
| <b>Daniel J. Clauw, MD, Co-Dir.;</b>                                                                                                                                                                                                                                                                                                                                                                                                                                                                                                                                                                                                                                                                                                                                                                                                                                                                                                                                                                                                                                                                                                                                                                                                                                                                                                                                                                                                            | Priyanka Gupta, MD                                                                                                                                                                                                                                                                                                                                                                                                                                                                                                                                                                                                                                                                                                                                                                                                                                                                                                                                                                                                                                                                                                                                                                                                                                                                                                                                                                                                                                                                                                                                                                                                                                                                                                                                                                                                                                                                                                                                                                                                                                                                                                                                                                                                                                                                                                                                                                                                                                                                                                                                                                                                                                                                                                                                                                                                                                                                                                                                                                                                                                                                                                                                                                                                                                                                                                                                                                                                                                                                                                                                                                                                                                                                                                                                                                                                                                                                                                                                                                                                                                                                                                                                                                                                                                                                                                                                                                                                                                                                                                                                                                                                                                                                                                                                                                                                                                                                                                                                                                                                          | Susanne Quallich, PhD, NP                                     |                        |                                 |                                          |                            |                     |                  |                     |                   |                   |                    |                   |                   |                   |             |                                     |                     |                        |                                          |                      |                        |                    |               |                          |                       |                  |                    |                    |  |  |                                      |                     |                     |                                |                          |                     |                  |                          |                   |                                      |                    |                           |                                 |                              |                             |                                            |                        |                     |                 |                      |                        |                             |                    |  |                         |  |  |                                     |                       |                      |                             |                 |                     |                           |                     |                       |                  |                  |                        |                  |                 |                    |                                         |                               |                                   |                                  |                                     |                            |                           |                    |                          |                                  |                     |                          |                             |                          |                        |                         |                    |                 |                                    |                          |                                                               |                         |                                          |                                   |                    |                                     |                   |                             |  |                   |                     |  |                   |                  |  |                     |                      |  |                    |                  |  |                     |                       |  |                       |               |  |                  |
| <b>Network Chair, 2008-2013</b>                                                                                                                                                                                                                                                                                                                                                                                                                                                                                                                                                                                                                                                                                                                                                                                                                                                                                                                                                                                                                                                                                                                                                                                                                                                                                                                                                                                                                 | Megan E. Halvorson, BS, CCRP                                                                                                                                                                                                                                                                                                                                                                                                                                                                                                                                                                                                                                                                                                                                                                                                                                                                                                                                                                                                                                                                                                                                                                                                                                                                                                                                                                                                                                                                                                                                                                                                                                                                                                                                                                                                                                                                                                                                                                                                                                                                                                                                                                                                                                                                                                                                                                                                                                                                                                                                                                                                                                                                                                                                                                                                                                                                                                                                                                                                                                                                                                                                                                                                                                                                                                                                                                                                                                                                                                                                                                                                                                                                                                                                                                                                                                                                                                                                                                                                                                                                                                                                                                                                                                                                                                                                                                                                                                                                                                                                                                                                                                                                                                                                                                                                                                                                                                                                                                                                | Katherine A. Scott, RN, BSN                                   |                        |                                 |                                          |                            |                     |                  |                     |                   |                   |                    |                   |                   |                   |             |                                     |                     |                        |                                          |                      |                        |                    |               |                          |                       |                  |                    |                    |  |  |                                      |                     |                     |                                |                          |                     |                  |                          |                   |                                      |                    |                           |                                 |                              |                             |                                            |                        |                     |                 |                      |                        |                             |                    |  |                         |  |  |                                     |                       |                      |                             |                 |                     |                           |                     |                       |                  |                  |                        |                  |                 |                    |                                         |                               |                                   |                                  |                                     |                            |                           |                    |                          |                                  |                     |                          |                             |                          |                        |                         |                    |                 |                                    |                          |                                                               |                         |                                          |                                   |                    |                                     |                   |                             |  |                   |                     |  |                   |                  |  |                     |                      |  |                    |                  |  |                     |                       |  |                       |               |  |                  |
| <b>J. Quentin Clemens, MD, FACS, MSci,</b>                                                                                                                                                                                                                                                                                                                                                                                                                                                                                                                                                                                                                                                                                                                                                                                                                                                                                                                                                                                                                                                                                                                                                                                                                                                                                                                                                                                                      | Richard E. Harris, PhD                                                                                                                                                                                                                                                                                                                                                                                                                                                                                                                                                                                                                                                                                                                                                                                                                                                                                                                                                                                                                                                                                                                                                                                                                                                                                                                                                                                                                                                                                                                                                                                                                                                                                                                                                                                                                                                                                                                                                                                                                                                                                                                                                                                                                                                                                                                                                                                                                                                                                                                                                                                                                                                                                                                                                                                                                                                                                                                                                                                                                                                                                                                                                                                                                                                                                                                                                                                                                                                                                                                                                                                                                                                                                                                                                                                                                                                                                                                                                                                                                                                                                                                                                                                                                                                                                                                                                                                                                                                                                                                                                                                                                                                                                                                                                                                                                                                                                                                                                                                                      | Andrew Schrepf, PhD                                           |                        |                                 |                                          |                            |                     |                  |                     |                   |                   |                    |                   |                   |                   |             |                                     |                     |                        |                                          |                      |                        |                    |               |                          |                       |                  |                    |                    |  |  |                                      |                     |                     |                                |                          |                     |                  |                          |                   |                                      |                    |                           |                                 |                              |                             |                                            |                        |                     |                 |                      |                        |                             |                    |  |                         |  |  |                                     |                       |                      |                             |                 |                     |                           |                     |                       |                  |                  |                        |                  |                 |                    |                                         |                               |                                   |                                  |                                     |                            |                           |                    |                          |                                  |                     |                          |                             |                          |                        |                         |                    |                 |                                    |                          |                                                               |                         |                                          |                                   |                    |                                     |                   |                             |  |                   |                     |  |                   |                  |  |                     |                      |  |                    |                  |  |                     |                       |  |                       |               |  |                  |
| <b>Co-Dir.;</b>                                                                                                                                                                                                                                                                                                                                                                                                                                                                                                                                                                                                                                                                                                                                                                                                                                                                                                                                                                                                                                                                                                                                                                                                                                                                                                                                                                                                                                 | Steven E. Harte, PhD                                                                                                                                                                                                                                                                                                                                                                                                                                                                                                                                                                                                                                                                                                                                                                                                                                                                                                                                                                                                                                                                                                                                                                                                                                                                                                                                                                                                                                                                                                                                                                                                                                                                                                                                                                                                                                                                                                                                                                                                                                                                                                                                                                                                                                                                                                                                                                                                                                                                                                                                                                                                                                                                                                                                                                                                                                                                                                                                                                                                                                                                                                                                                                                                                                                                                                                                                                                                                                                                                                                                                                                                                                                                                                                                                                                                                                                                                                                                                                                                                                                                                                                                                                                                                                                                                                                                                                                                                                                                                                                                                                                                                                                                                                                                                                                                                                                                                                                                                                                                        | David A. Williams, PhD                                        |                        |                                 |                                          |                            |                     |                  |                     |                   |                   |                    |                   |                   |                   |             |                                     |                     |                        |                                          |                      |                        |                    |               |                          |                       |                  |                    |                    |  |  |                                      |                     |                     |                                |                          |                     |                  |                          |                   |                                      |                    |                           |                                 |                              |                             |                                            |                        |                     |                 |                      |                        |                             |                    |  |                         |  |  |                                     |                       |                      |                             |                 |                     |                           |                     |                       |                  |                  |                        |                  |                 |                    |                                         |                               |                                   |                                  |                                     |                            |                           |                    |                          |                                  |                     |                          |                             |                          |                        |                         |                    |                 |                                    |                          |                                                               |                         |                                          |                                   |                    |                                     |                   |                             |  |                   |                     |  |                   |                  |  |                     |                      |  |                    |                  |  |                     |                       |  |                       |               |  |                  |
| <b>Network Chair, 2013-</b>                                                                                                                                                                                                                                                                                                                                                                                                                                                                                                                                                                                                                                                                                                                                                                                                                                                                                                                                                                                                                                                                                                                                                                                                                                                                                                                                                                                                                     | Suzie As-Sanie, MD                                                                                                                                                                                                                                                                                                                                                                                                                                                                                                                                                                                                                                                                                                                                                                                                                                                                                                                                                                                                                                                                                                                                                                                                                                                                                                                                                                                                                                                                                                                                                                                                                                                                                                                                                                                                                                                                                                                                                                                                                                                                                                                                                                                                                                                                                                                                                                                                                                                                                                                                                                                                                                                                                                                                                                                                                                                                                                                                                                                                                                                                                                                                                                                                                                                                                                                                                                                                                                                                                                                                                                                                                                                                                                                                                                                                                                                                                                                                                                                                                                                                                                                                                                                                                                                                                                                                                                                                                                                                                                                                                                                                                                                                                                                                                                                                                                                                                                                                                                                                          |                                                               |                        |                                 |                                          |                            |                     |                  |                     |                   |                   |                    |                   |                   |                   |             |                                     |                     |                        |                                          |                      |                        |                    |               |                          |                       |                  |                    |                    |  |  |                                      |                     |                     |                                |                          |                     |                  |                          |                   |                                      |                    |                           |                                 |                              |                             |                                            |                        |                     |                 |                      |                        |                             |                    |  |                         |  |  |                                     |                       |                      |                             |                 |                     |                           |                     |                       |                  |                  |                        |                  |                 |                    |                                         |                               |                                   |                                  |                                     |                            |                           |                    |                          |                                  |                     |                          |                             |                          |                        |                         |                    |                 |                                    |                          |                                                               |                         |                                          |                                   |                    |                                     |                   |                             |  |                   |                     |  |                   |                  |  |                     |                      |  |                    |                  |  |                     |                       |  |                       |               |  |                  |
| <b>Eric Ichesco, MD</b>                                                                                                                                                                                                                                                                                                                                                                                                                                                                                                                                                                                                                                                                                                                                                                                                                                                                                                                                                                                                                                                                                                                                                                                                                                                                                                                                                                                                                         |                                                                                                                                                                                                                                                                                                                                                                                                                                                                                                                                                                                                                                                                                                                                                                                                                                                                                                                                                                                                                                                                                                                                                                                                                                                                                                                                                                                                                                                                                                                                                                                                                                                                                                                                                                                                                                                                                                                                                                                                                                                                                                                                                                                                                                                                                                                                                                                                                                                                                                                                                                                                                                                                                                                                                                                                                                                                                                                                                                                                                                                                                                                                                                                                                                                                                                                                                                                                                                                                                                                                                                                                                                                                                                                                                                                                                                                                                                                                                                                                                                                                                                                                                                                                                                                                                                                                                                                                                                                                                                                                                                                                                                                                                                                                                                                                                                                                                                                                                                                                                             |                                                               |                        |                                 |                                          |                            |                     |                  |                     |                   |                   |                    |                   |                   |                   |             |                                     |                     |                        |                                          |                      |                        |                    |               |                          |                       |                  |                    |                    |  |  |                                      |                     |                     |                                |                          |                     |                  |                          |                   |                                      |                    |                           |                                 |                              |                             |                                            |                        |                     |                 |                      |                        |                             |                    |  |                         |  |  |                                     |                       |                      |                             |                 |                     |                           |                     |                       |                  |                  |                        |                  |                 |                    |                                         |                               |                                   |                                  |                                     |                            |                           |                    |                          |                                  |                     |                          |                             |                          |                        |                         |                    |                 |                                    |                          |                                                               |                         |                                          |                                   |                    |                                     |                   |                             |  |                   |                     |  |                   |                  |  |                     |                      |  |                    |                  |  |                     |                       |  |                       |               |  |                  |
| <b>Debra Buchwald, MD, WSU Dir.</b>                                                                                                                                                                                                                                                                                                                                                                                                                                                                                                                                                                                                                                                                                                                                                                                                                                                                                                                                                                                                                                                                                                                                                                                                                                                                                                                                                                                                             | Kenneth Maravilla, MD                                                                                                                                                                                                                                                                                                                                                                                                                                                                                                                                                                                                                                                                                                                                                                                                                                                                                                                                                                                                                                                                                                                                                                                                                                                                                                                                                                                                                                                                                                                                                                                                                                                                                                                                                                                                                                                                                                                                                                                                                                                                                                                                                                                                                                                                                                                                                                                                                                                                                                                                                                                                                                                                                                                                                                                                                                                                                                                                                                                                                                                                                                                                                                                                                                                                                                                                                                                                                                                                                                                                                                                                                                                                                                                                                                                                                                                                                                                                                                                                                                                                                                                                                                                                                                                                                                                                                                                                                                                                                                                                                                                                                                                                                                                                                                                                                                                                                                                                                                                                       | Stephanie Richey, BS                                          |                        |                                 |                                          |                            |                     |                  |                     |                   |                   |                    |                   |                   |                   |             |                                     |                     |                        |                                          |                      |                        |                    |               |                          |                       |                  |                    |                    |  |  |                                      |                     |                     |                                |                          |                     |                  |                          |                   |                                      |                    |                           |                                 |                              |                             |                                            |                        |                     |                 |                      |                        |                             |                    |  |                         |  |  |                                     |                       |                      |                             |                 |                     |                           |                     |                       |                  |                  |                        |                  |                 |                    |                                         |                               |                                   |                                  |                                     |                            |                           |                    |                          |                                  |                     |                          |                             |                          |                        |                         |                    |                 |                                    |                          |                                                               |                         |                                          |                                   |                    |                                     |                   |                             |  |                   |                     |  |                   |                  |  |                     |                      |  |                    |                  |  |                     |                       |  |                       |               |  |                  |
| Eric Strachan, PhD, UW Dir.                                                                                                                                                                                                                                                                                                                                                                                                                                                                                                                                                                                                                                                                                                                                                                                                                                                                                                                                                                                                                                                                                                                                                                                                                                                                                                                                                                                                                     | Jane Miller, MD                                                                                                                                                                                                                                                                                                                                                                                                                                                                                                                                                                                                                                                                                                                                                                                                                                                                                                                                                                                                                                                                                                                                                                                                                                                                                                                                                                                                                                                                                                                                                                                                                                                                                                                                                                                                                                                                                                                                                                                                                                                                                                                                                                                                                                                                                                                                                                                                                                                                                                                                                                                                                                                                                                                                                                                                                                                                                                                                                                                                                                                                                                                                                                                                                                                                                                                                                                                                                                                                                                                                                                                                                                                                                                                                                                                                                                                                                                                                                                                                                                                                                                                                                                                                                                                                                                                                                                                                                                                                                                                                                                                                                                                                                                                                                                                                                                                                                                                                                                                                             | Kelly Robertson, BS                                           |                        |                                 |                                          |                            |                     |                  |                     |                   |                   |                    |                   |                   |                   |             |                                     |                     |                        |                                          |                      |                        |                    |               |                          |                       |                  |                    |                    |  |  |                                      |                     |                     |                                |                          |                     |                  |                          |                   |                                      |                    |                           |                                 |                              |                             |                                            |                        |                     |                 |                      |                        |                             |                    |  |                         |  |  |                                     |                       |                      |                             |                 |                     |                           |                     |                       |                  |                  |                        |                  |                 |                    |                                         |                               |                                   |                                  |                                     |                            |                           |                    |                          |                                  |                     |                          |                             |                          |                        |                         |                    |                 |                                    |                          |                                                               |                         |                                          |                                   |                    |                                     |                   |                             |  |                   |                     |  |                   |                  |  |                     |                      |  |                    |                  |  |                     |                       |  |                       |               |  |                  |
| Niloofer Afari, PhD, UCSD                                                                                                                                                                                                                                                                                                                                                                                                                                                                                                                                                                                                                                                                                                                                                                                                                                                                                                                                                                                                                                                                                                                                                                                                                                                                                                                                                                                                                       | Jean Kallhoff, ARNP                                                                                                                                                                                                                                                                                                                                                                                                                                                                                                                                                                                                                                                                                                                                                                                                                                                                                                                                                                                                                                                                                                                                                                                                                                                                                                                                                                                                                                                                                                                                                                                                                                                                                                                                                                                                                                                                                                                                                                                                                                                                                                                                                                                                                                                                                                                                                                                                                                                                                                                                                                                                                                                                                                                                                                                                                                                                                                                                                                                                                                                                                                                                                                                                                                                                                                                                                                                                                                                                                                                                                                                                                                                                                                                                                                                                                                                                                                                                                                                                                                                                                                                                                                                                                                                                                                                                                                                                                                                                                                                                                                                                                                                                                                                                                                                                                                                                                                                                                                                                         | Susan O. Ross, RN, MN                                         |                        |                                 |                                          |                            |                     |                  |                     |                   |                   |                    |                   |                   |                   |             |                                     |                     |                        |                                          |                      |                        |                    |               |                          |                       |                  |                    |                    |  |  |                                      |                     |                     |                                |                          |                     |                  |                          |                   |                                      |                    |                           |                                 |                              |                             |                                            |                        |                     |                 |                      |                        |                             |                    |  |                         |  |  |                                     |                       |                      |                             |                 |                     |                           |                     |                       |                  |                  |                        |                  |                 |                    |                                         |                               |                                   |                                  |                                     |                            |                           |                    |                          |                                  |                     |                          |                             |                          |                        |                         |                    |                 |                                    |                          |                                                               |                         |                                          |                                   |                    |                                     |                   |                             |  |                   |                     |  |                   |                  |  |                     |                      |  |                    |                  |  |                     |                       |  |                       |               |  |                  |
| Tamara Bacus, BS                                                                                                                                                                                                                                                                                                                                                                                                                                                                                                                                                                                                                                                                                                                                                                                                                                                                                                                                                                                                                                                                                                                                                                                                                                                                                                                                                                                                                                | Cara Kulbaki, BS                                                                                                                                                                                                                                                                                                                                                                                                                                                                                                                                                                                                                                                                                                                                                                                                                                                                                                                                                                                                                                                                                                                                                                                                                                                                                                                                                                                                                                                                                                                                                                                                                                                                                                                                                                                                                                                                                                                                                                                                                                                                                                                                                                                                                                                                                                                                                                                                                                                                                                                                                                                                                                                                                                                                                                                                                                                                                                                                                                                                                                                                                                                                                                                                                                                                                                                                                                                                                                                                                                                                                                                                                                                                                                                                                                                                                                                                                                                                                                                                                                                                                                                                                                                                                                                                                                                                                                                                                                                                                                                                                                                                                                                                                                                                                                                                                                                                                                                                                                                                            | Suzette Sutherland, MD                                        |                        |                                 |                                          |                            |                     |                  |                     |                   |                   |                    |                   |                   |                   |             |                                     |                     |                        |                                          |                      |                        |                    |               |                          |                       |                  |                    |                    |  |  |                                      |                     |                     |                                |                          |                     |                  |                          |                   |                                      |                    |                           |                                 |                              |                             |                                            |                        |                     |                 |                      |                        |                             |                    |  |                         |  |  |                                     |                       |                      |                             |                 |                     |                           |                     |                       |                  |                  |                        |                  |                 |                    |                                         |                               |                                   |                                  |                                     |                            |                           |                    |                          |                                  |                     |                          |                             |                          |                        |                         |                    |                 |                                    |                          |                                                               |                         |                                          |                                   |                    |                                     |                   |                             |  |                   |                     |  |                   |                  |  |                     |                      |  |                    |                  |  |                     |                       |  |                       |               |  |                  |
| John Krieger, MD                                                                                                                                                                                                                                                                                                                                                                                                                                                                                                                                                                                                                                                                                                                                                                                                                                                                                                                                                                                                                                                                                                                                                                                                                                                                                                                                                                                                                                | Swati Rane, PhD                                                                                                                                                                                                                                                                                                                                                                                                                                                                                                                                                                                                                                                                                                                                                                                                                                                                                                                                                                                                                                                                                                                                                                                                                                                                                                                                                                                                                                                                                                                                                                                                                                                                                                                                                                                                                                                                                                                                                                                                                                                                                                                                                                                                                                                                                                                                                                                                                                                                                                                                                                                                                                                                                                                                                                                                                                                                                                                                                                                                                                                                                                                                                                                                                                                                                                                                                                                                                                                                                                                                                                                                                                                                                                                                                                                                                                                                                                                                                                                                                                                                                                                                                                                                                                                                                                                                                                                                                                                                                                                                                                                                                                                                                                                                                                                                                                                                                                                                                                                                             | Claire C. Yang, MD                                            |                        |                                 |                                          |                            |                     |                  |                     |                   |                   |                    |                   |                   |                   |             |                                     |                     |                        |                                          |                      |                        |                    |               |                          |                       |                  |                    |                    |  |  |                                      |                     |                     |                                |                          |                     |                  |                          |                   |                                      |                    |                           |                                 |                              |                             |                                            |                        |                     |                 |                      |                        |                             |                    |  |                         |  |  |                                     |                       |                      |                             |                 |                     |                           |                     |                       |                  |                  |                        |                  |                 |                    |                                         |                               |                                   |                                  |                                     |                            |                           |                    |                          |                                  |                     |                          |                             |                          |                        |                         |                    |                 |                                    |                          |                                                               |                         |                                          |                                   |                    |                                     |                   |                             |  |                   |                     |  |                   |                  |  |                     |                      |  |                    |                  |  |                     |                       |  |                       |               |  |                  |
| <b>Gerald L. Andriole, MD, Co-Dir..</b>                                                                                                                                                                                                                                                                                                                                                                                                                                                                                                                                                                                                                                                                                                                                                                                                                                                                                                                                                                                                                                                                                                                                                                                                                                                                                                                                                                                                         | Jeffrey P. Henderson, MD, PhD                                                                                                                                                                                                                                                                                                                                                                                                                                                                                                                                                                                                                                                                                                                                                                                                                                                                                                                                                                                                                                                                                                                                                                                                                                                                                                                                                                                                                                                                                                                                                                                                                                                                                                                                                                                                                                                                                                                                                                                                                                                                                                                                                                                                                                                                                                                                                                                                                                                                                                                                                                                                                                                                                                                                                                                                                                                                                                                                                                                                                                                                                                                                                                                                                                                                                                                                                                                                                                                                                                                                                                                                                                                                                                                                                                                                                                                                                                                                                                                                                                                                                                                                                                                                                                                                                                                                                                                                                                                                                                                                                                                                                                                                                                                                                                                                                                                                                                                                                                                               | Aleksandra P. Klim, RN, MHS, CCRC                             |                        |                                 |                                          |                            |                     |                  |                     |                   |                   |                    |                   |                   |                   |             |                                     |                     |                        |                                          |                      |                        |                    |               |                          |                       |                  |                    |                    |  |  |                                      |                     |                     |                                |                          |                     |                  |                          |                   |                                      |                    |                           |                                 |                              |                             |                                            |                        |                     |                 |                      |                        |                             |                    |  |                         |  |  |                                     |                       |                      |                             |                 |                     |                           |                     |                       |                  |                  |                        |                  |                 |                    |                                         |                               |                                   |                                  |                                     |                            |                           |                    |                          |                                  |                     |                          |                             |                          |                        |                         |                    |                 |                                    |                          |                                                               |                         |                                          |                                   |                    |                                     |                   |                             |  |                   |                     |  |                   |                  |  |                     |                      |  |                    |                  |  |                     |                       |  |                       |               |  |                  |
| <b>H. Henry Lai, MD, Co-Dir.</b>                                                                                                                                                                                                                                                                                                                                                                                                                                                                                                                                                                                                                                                                                                                                                                                                                                                                                                                                                                                                                                                                                                                                                                                                                                                                                                                                                                                                                | Theresa M. Spitznagle, PT, DPT, WCS                                                                                                                                                                                                                                                                                                                                                                                                                                                                                                                                                                                                                                                                                                                                                                                                                                                                                                                                                                                                                                                                                                                                                                                                                                                                                                                                                                                                                                                                                                                                                                                                                                                                                                                                                                                                                                                                                                                                                                                                                                                                                                                                                                                                                                                                                                                                                                                                                                                                                                                                                                                                                                                                                                                                                                                                                                                                                                                                                                                                                                                                                                                                                                                                                                                                                                                                                                                                                                                                                                                                                                                                                                                                                                                                                                                                                                                                                                                                                                                                                                                                                                                                                                                                                                                                                                                                                                                                                                                                                                                                                                                                                                                                                                                                                                                                                                                                                                                                                                                         | Vivien C. Gardner, RN, BSN                                    |                        |                                 |                                          |                            |                     |                  |                     |                   |                   |                    |                   |                   |                   |             |                                     |                     |                        |                                          |                      |                        |                    |               |                          |                       |                  |                    |                    |  |  |                                      |                     |                     |                                |                          |                     |                  |                          |                   |                                      |                    |                           |                                 |                              |                             |                                            |                        |                     |                 |                      |                        |                             |                    |  |                         |  |  |                                     |                       |                      |                             |                 |                     |                           |                     |                       |                  |                  |                        |                  |                 |                    |                                         |                               |                                   |                                  |                                     |                            |                           |                    |                          |                                  |                     |                          |                             |                          |                        |                         |                    |                 |                                    |                          |                                                               |                         |                                          |                                   |                    |                                     |                   |                             |  |                   |                     |  |                   |                  |  |                     |                      |  |                    |                  |  |                     |                       |  |                       |               |  |                  |
| Robert W. Gereau IV, PhD,                                                                                                                                                                                                                                                                                                                                                                                                                                                                                                                                                                                                                                                                                                                                                                                                                                                                                                                                                                                                                                                                                                                                                                                                                                                                                                                                                                                                                       | Barry A. Hong, PhD                                                                                                                                                                                                                                                                                                                                                                                                                                                                                                                                                                                                                                                                                                                                                                                                                                                                                                                                                                                                                                                                                                                                                                                                                                                                                                                                                                                                                                                                                                                                                                                                                                                                                                                                                                                                                                                                                                                                                                                                                                                                                                                                                                                                                                                                                                                                                                                                                                                                                                                                                                                                                                                                                                                                                                                                                                                                                                                                                                                                                                                                                                                                                                                                                                                                                                                                                                                                                                                                                                                                                                                                                                                                                                                                                                                                                                                                                                                                                                                                                                                                                                                                                                                                                                                                                                                                                                                                                                                                                                                                                                                                                                                                                                                                                                                                                                                                                                                                                                                                          | Deborah Ksiazek, RN, BSN                                      |                        |                                 |                                          |                            |                     |                  |                     |                   |                   |                    |                   |                   |                   |             |                                     |                     |                        |                                          |                      |                        |                    |               |                          |                       |                  |                    |                    |  |  |                                      |                     |                     |                                |                          |                     |                  |                          |                   |                                      |                    |                           |                                 |                              |                             |                                            |                        |                     |                 |                      |                        |                             |                    |  |                         |  |  |                                     |                       |                      |                             |                 |                     |                           |                     |                       |                  |                  |                        |                  |                 |                    |                                         |                               |                                   |                                  |                                     |                            |                           |                    |                          |                                  |                     |                          |                             |                          |                        |                         |                    |                 |                                    |                          |                                                               |                         |                                          |                                   |                    |                                     |                   |                             |  |                   |                     |  |                   |                  |  |                     |                      |  |                    |                  |  |                     |                       |  |                       |               |  |                  |
| Siobhan Sutcliffe, PhD, ScM, MHS                                                                                                                                                                                                                                                                                                                                                                                                                                                                                                                                                                                                                                                                                                                                                                                                                                                                                                                                                                                                                                                                                                                                                                                                                                                                                                                                                                                                                | Akinkunle Owoso, MD                                                                                                                                                                                                                                                                                                                                                                                                                                                                                                                                                                                                                                                                                                                                                                                                                                                                                                                                                                                                                                                                                                                                                                                                                                                                                                                                                                                                                                                                                                                                                                                                                                                                                                                                                                                                                                                                                                                                                                                                                                                                                                                                                                                                                                                                                                                                                                                                                                                                                                                                                                                                                                                                                                                                                                                                                                                                                                                                                                                                                                                                                                                                                                                                                                                                                                                                                                                                                                                                                                                                                                                                                                                                                                                                                                                                                                                                                                                                                                                                                                                                                                                                                                                                                                                                                                                                                                                                                                                                                                                                                                                                                                                                                                                                                                                                                                                                                                                                                                                                         | Patricia Hayden, RN, BSN                                      |                        |                                 |                                          |                            |                     |                  |                     |                   |                   |                    |                   |                   |                   |             |                                     |                     |                        |                                          |                      |                        |                    |               |                          |                       |                  |                    |                    |  |  |                                      |                     |                     |                                |                          |                     |                  |                          |                   |                                      |                    |                           |                                 |                              |                             |                                            |                        |                     |                 |                      |                        |                             |                    |  |                         |  |  |                                     |                       |                      |                             |                 |                     |                           |                     |                       |                  |                  |                        |                  |                 |                    |                                         |                               |                                   |                                  |                                     |                            |                           |                    |                          |                                  |                     |                          |                             |                          |                        |                         |                    |                 |                                    |                          |                                                               |                         |                                          |                                   |                    |                                     |                   |                             |  |                   |                     |  |                   |                  |  |                     |                      |  |                    |                  |  |                     |                       |  |                       |               |  |                  |
| Graham A. Colditz, MD, DrPH                                                                                                                                                                                                                                                                                                                                                                                                                                                                                                                                                                                                                                                                                                                                                                                                                                                                                                                                                                                                                                                                                                                                                                                                                                                                                                                                                                                                                     | Timothy J. Ness, MD, PhD                                                                                                                                                                                                                                                                                                                                                                                                                                                                                                                                                                                                                                                                                                                                                                                                                                                                                                                                                                                                                                                                                                                                                                                                                                                                                                                                                                                                                                                                                                                                                                                                                                                                                                                                                                                                                                                                                                                                                                                                                                                                                                                                                                                                                                                                                                                                                                                                                                                                                                                                                                                                                                                                                                                                                                                                                                                                                                                                                                                                                                                                                                                                                                                                                                                                                                                                                                                                                                                                                                                                                                                                                                                                                                                                                                                                                                                                                                                                                                                                                                                                                                                                                                                                                                                                                                                                                                                                                                                                                                                                                                                                                                                                                                                                                                                                                                                                                                                                                                                                    | Susan Mueller, RN, BSN                                        |                        |                                 |                                          |                            |                     |                  |                     |                   |                   |                    |                   |                   |                   |             |                                     |                     |                        |                                          |                      |                        |                    |               |                          |                       |                  |                    |                    |  |  |                                      |                     |                     |                                |                          |                     |                  |                          |                   |                                      |                    |                           |                                 |                              |                             |                                            |                        |                     |                 |                      |                        |                             |                    |  |                         |  |  |                                     |                       |                      |                             |                 |                     |                           |                     |                       |                  |                  |                        |                  |                 |                    |                                         |                               |                                   |                                  |                                     |                            |                           |                    |                          |                                  |                     |                          |                             |                          |                        |                         |                    |                 |                                    |                          |                                                               |                         |                                          |                                   |                    |                                     |                   |                             |  |                   |                     |  |                   |                  |  |                     |                      |  |                    |                  |  |                     |                       |  |                       |               |  |                  |
| Simon Haroutounian, PhD                                                                                                                                                                                                                                                                                                                                                                                                                                                                                                                                                                                                                                                                                                                                                                                                                                                                                                                                                                                                                                                                                                                                                                                                                                                                                                                                                                                                                         | Georg Deutsch, PhD                                                                                                                                                                                                                                                                                                                                                                                                                                                                                                                                                                                                                                                                                                                                                                                                                                                                                                                                                                                                                                                                                                                                                                                                                                                                                                                                                                                                                                                                                                                                                                                                                                                                                                                                                                                                                                                                                                                                                                                                                                                                                                                                                                                                                                                                                                                                                                                                                                                                                                                                                                                                                                                                                                                                                                                                                                                                                                                                                                                                                                                                                                                                                                                                                                                                                                                                                                                                                                                                                                                                                                                                                                                                                                                                                                                                                                                                                                                                                                                                                                                                                                                                                                                                                                                                                                                                                                                                                                                                                                                                                                                                                                                                                                                                                                                                                                                                                                                                                                                                          | Maria Payne, BA                                               |                        |                                 |                                          |                            |                     |                  |                     |                   |                   |                    |                   |                   |                   |             |                                     |                     |                        |                                          |                      |                        |                    |               |                          |                       |                  |                    |                    |  |  |                                      |                     |                     |                                |                          |                     |                  |                          |                   |                                      |                    |                           |                                 |                              |                             |                                            |                        |                     |                 |                      |                        |                             |                    |  |                         |  |  |                                     |                       |                      |                             |                 |                     |                           |                     |                       |                  |                  |                        |                  |                 |                    |                                         |                               |                                   |                                  |                                     |                            |                           |                    |                          |                                  |                     |                          |                             |                          |                        |                         |                    |                 |                                    |                          |                                                               |                         |                                          |                                   |                    |                                     |                   |                             |  |                   |                     |  |                   |                  |  |                     |                      |  |                    |                  |  |                     |                       |  |                       |               |  |                  |
| <b>Cedars-Sinai Medical Center</b>                                                                                                                                                                                                                                                                                                                                                                                                                                                                                                                                                                                                                                                                                                                                                                                                                                                                                                                                                                                                                                                                                                                                                                                                                                                                                                                                                                                                              | <b>Queens University</b>                                                                                                                                                                                                                                                                                                                                                                                                                                                                                                                                                                                                                                                                                                                                                                                                                                                                                                                                                                                                                                                                                                                                                                                                                                                                                                                                                                                                                                                                                                                                                                                                                                                                                                                                                                                                                                                                                                                                                                                                                                                                                                                                                                                                                                                                                                                                                                                                                                                                                                                                                                                                                                                                                                                                                                                                                                                                                                                                                                                                                                                                                                                                                                                                                                                                                                                                                                                                                                                                                                                                                                                                                                                                                                                                                                                                                                                                                                                                                                                                                                                                                                                                                                                                                                                                                                                                                                                                                                                                                                                                                                                                                                                                                                                                                                                                                                                                                                                                                                                                    | <b>Harvard Medical School/<br/>Boston Children's Hospital</b> |                        |                                 |                                          |                            |                     |                  |                     |                   |                   |                    |                   |                   |                   |             |                                     |                     |                        |                                          |                      |                        |                    |               |                          |                       |                  |                    |                    |  |  |                                      |                     |                     |                                |                          |                     |                  |                          |                   |                                      |                    |                           |                                 |                              |                             |                                            |                        |                     |                 |                      |                        |                             |                    |  |                         |  |  |                                     |                       |                      |                             |                 |                     |                           |                     |                       |                  |                  |                        |                  |                 |                    |                                         |                               |                                   |                                  |                                     |                            |                           |                    |                          |                                  |                     |                          |                             |                          |                        |                         |                    |                 |                                    |                          |                                                               |                         |                                          |                                   |                    |                                     |                   |                             |  |                   |                     |  |                   |                  |  |                     |                      |  |                    |                  |  |                     |                       |  |                       |               |  |                  |
| Jennifer Anger, MD, MPH                                                                                                                                                                                                                                                                                                                                                                                                                                                                                                                                                                                                                                                                                                                                                                                                                                                                                                                                                                                                                                                                                                                                                                                                                                                                                                                                                                                                                         | <b>J. Curtis Nickel, MD, FRCSC, Dir.</b>                                                                                                                                                                                                                                                                                                                                                                                                                                                                                                                                                                                                                                                                                                                                                                                                                                                                                                                                                                                                                                                                                                                                                                                                                                                                                                                                                                                                                                                                                                                                                                                                                                                                                                                                                                                                                                                                                                                                                                                                                                                                                                                                                                                                                                                                                                                                                                                                                                                                                                                                                                                                                                                                                                                                                                                                                                                                                                                                                                                                                                                                                                                                                                                                                                                                                                                                                                                                                                                                                                                                                                                                                                                                                                                                                                                                                                                                                                                                                                                                                                                                                                                                                                                                                                                                                                                                                                                                                                                                                                                                                                                                                                                                                                                                                                                                                                                                                                                                                                                    | <b>Marsha A. Moses, PhD, Dir.</b>                             |                        |                                 |                                          |                            |                     |                  |                     |                   |                   |                    |                   |                   |                   |             |                                     |                     |                        |                                          |                      |                        |                    |               |                          |                       |                  |                    |                    |  |  |                                      |                     |                     |                                |                          |                     |                  |                          |                   |                                      |                    |                           |                                 |                              |                             |                                            |                        |                     |                 |                      |                        |                             |                    |  |                         |  |  |                                     |                       |                      |                             |                 |                     |                           |                     |                       |                  |                  |                        |                  |                 |                    |                                         |                               |                                   |                                  |                                     |                            |                           |                    |                          |                                  |                     |                          |                             |                          |                        |                         |                    |                 |                                    |                          |                                                               |                         |                                          |                                   |                    |                                     |                   |                             |  |                   |                     |  |                   |                  |  |                     |                      |  |                    |                  |  |                     |                       |  |                       |               |  |                  |
| James Ackerman, MA                                                                                                                                                                                                                                                                                                                                                                                                                                                                                                                                                                                                                                                                                                                                                                                                                                                                                                                                                                                                                                                                                                                                                                                                                                                                                                                                                                                                                              | Garth D. Ehrlich, PhD, [Drexel COM]                                                                                                                                                                                                                                                                                                                                                                                                                                                                                                                                                                                                                                                                                                                                                                                                                                                                                                                                                                                                                                                                                                                                                                                                                                                                                                                                                                                                                                                                                                                                                                                                                                                                                                                                                                                                                                                                                                                                                                                                                                                                                                                                                                                                                                                                                                                                                                                                                                                                                                                                                                                                                                                                                                                                                                                                                                                                                                                                                                                                                                                                                                                                                                                                                                                                                                                                                                                                                                                                                                                                                                                                                                                                                                                                                                                                                                                                                                                                                                                                                                                                                                                                                                                                                                                                                                                                                                                                                                                                                                                                                                                                                                                                                                                                                                                                                                                                                                                                                                                         | Andrew C. Briscoe                                             |                        |                                 |                                          |                            |                     |                  |                     |                   |                   |                    |                   |                   |                   |             |                                     |                     |                        |                                          |                      |                        |                    |               |                          |                       |                  |                    |                    |  |  |                                      |                     |                     |                                |                          |                     |                  |                          |                   |                                      |                    |                           |                                 |                              |                             |                                            |                        |                     |                 |                      |                        |                             |                    |  |                         |  |  |                                     |                       |                      |                             |                 |                     |                           |                     |                       |                  |                  |                        |                  |                 |                    |                                         |                               |                                   |                                  |                                     |                            |                           |                    |                          |                                  |                     |                          |                             |                          |                        |                         |                    |                 |                                    |                          |                                                               |                         |                                          |                                   |                    |                                     |                   |                             |  |                   |                     |  |                   |                  |  |                     |                      |  |                    |                  |  |                     |                       |  |                       |               |  |                  |
| A. Lenore Ackerman, MD, PhD                                                                                                                                                                                                                                                                                                                                                                                                                                                                                                                                                                                                                                                                                                                                                                                                                                                                                                                                                                                                                                                                                                                                                                                                                                                                                                                                                                                                                     |                                                                                                                                                                                                                                                                                                                                                                                                                                                                                                                                                                                                                                                                                                                                                                                                                                                                                                                                                                                                                                                                                                                                                                                                                                                                                                                                                                                                                                                                                                                                                                                                                                                                                                                                                                                                                                                                                                                                                                                                                                                                                                                                                                                                                                                                                                                                                                                                                                                                                                                                                                                                                                                                                                                                                                                                                                                                                                                                                                                                                                                                                                                                                                                                                                                                                                                                                                                                                                                                                                                                                                                                                                                                                                                                                                                                                                                                                                                                                                                                                                                                                                                                                                                                                                                                                                                                                                                                                                                                                                                                                                                                                                                                                                                                                                                                                                                                                                                                                                                                                             | David Briscoe, MD                                             |                        |                                 |                                          |                            |                     |                  |                     |                   |                   |                    |                   |                   |                   |             |                                     |                     |                        |                                          |                      |                        |                    |               |                          |                       |                  |                    |                    |  |  |                                      |                     |                     |                                |                          |                     |                  |                          |                   |                                      |                    |                           |                                 |                              |                             |                                            |                        |                     |                 |                      |                        |                             |                    |  |                         |  |  |                                     |                       |                      |                             |                 |                     |                           |                     |                       |                  |                  |                        |                  |                 |                    |                                         |                               |                                   |                                  |                                     |                            |                           |                    |                          |                                  |                     |                          |                             |                          |                        |                         |                    |                 |                                    |                          |                                                               |                         |                                          |                                   |                    |                                     |                   |                             |  |                   |                     |  |                   |                  |  |                     |                      |  |                    |                  |  |                     |                       |  |                       |               |  |                  |
| Jeena Cha, BS, CCRP                                                                                                                                                                                                                                                                                                                                                                                                                                                                                                                                                                                                                                                                                                                                                                                                                                                                                                                                                                                                                                                                                                                                                                                                                                                                                                                                                                                                                             |                                                                                                                                                                                                                                                                                                                                                                                                                                                                                                                                                                                                                                                                                                                                                                                                                                                                                                                                                                                                                                                                                                                                                                                                                                                                                                                                                                                                                                                                                                                                                                                                                                                                                                                                                                                                                                                                                                                                                                                                                                                                                                                                                                                                                                                                                                                                                                                                                                                                                                                                                                                                                                                                                                                                                                                                                                                                                                                                                                                                                                                                                                                                                                                                                                                                                                                                                                                                                                                                                                                                                                                                                                                                                                                                                                                                                                                                                                                                                                                                                                                                                                                                                                                                                                                                                                                                                                                                                                                                                                                                                                                                                                                                                                                                                                                                                                                                                                                                                                                                                             | Adam Curatolo, BA                                             |                        |                                 |                                          |                            |                     |                  |                     |                   |                   |                    |                   |                   |                   |             |                                     |                     |                        |                                          |                      |                        |                    |               |                          |                       |                  |                    |                    |  |  |                                      |                     |                     |                                |                          |                     |                  |                          |                   |                                      |                    |                           |                                 |                              |                             |                                            |                        |                     |                 |                      |                        |                             |                    |  |                         |  |  |                                     |                       |                      |                             |                 |                     |                           |                     |                       |                  |                  |                        |                  |                 |                    |                                         |                               |                                   |                                  |                                     |                            |                           |                    |                          |                                  |                     |                          |                             |                          |                        |                         |                    |                 |                                    |                          |                                                               |                         |                                          |                                   |                    |                                     |                   |                             |  |                   |                     |  |                   |                  |  |                     |                      |  |                    |                  |  |                     |                       |  |                       |               |  |                  |
| Karyn Eilber, MD                                                                                                                                                                                                                                                                                                                                                                                                                                                                                                                                                                                                                                                                                                                                                                                                                                                                                                                                                                                                                                                                                                                                                                                                                                                                                                                                                                                                                                |                                                                                                                                                                                                                                                                                                                                                                                                                                                                                                                                                                                                                                                                                                                                                                                                                                                                                                                                                                                                                                                                                                                                                                                                                                                                                                                                                                                                                                                                                                                                                                                                                                                                                                                                                                                                                                                                                                                                                                                                                                                                                                                                                                                                                                                                                                                                                                                                                                                                                                                                                                                                                                                                                                                                                                                                                                                                                                                                                                                                                                                                                                                                                                                                                                                                                                                                                                                                                                                                                                                                                                                                                                                                                                                                                                                                                                                                                                                                                                                                                                                                                                                                                                                                                                                                                                                                                                                                                                                                                                                                                                                                                                                                                                                                                                                                                                                                                                                                                                                                                             | John Froehlich, PhD                                           |                        |                                 |                                          |                            |                     |                  |                     |                   |                   |                    |                   |                   |                   |             |                                     |                     |                        |                                          |                      |                        |                    |               |                          |                       |                  |                    |                    |  |  |                                      |                     |                     |                                |                          |                     |                  |                          |                   |                                      |                    |                           |                                 |                              |                             |                                            |                        |                     |                 |                      |                        |                             |                    |  |                         |  |  |                                     |                       |                      |                             |                 |                     |                           |                     |                       |                  |                  |                        |                  |                 |                    |                                         |                               |                                   |                                  |                                     |                            |                           |                    |                          |                                  |                     |                          |                             |                          |                        |                         |                    |                 |                                    |                          |                                                               |                         |                                          |                                   |                    |                                     |                   |                             |  |                   |                     |  |                   |                  |  |                     |                      |  |                    |                  |  |                     |                       |  |                       |               |  |                  |
| Michael Freeman, PhD                                                                                                                                                                                                                                                                                                                                                                                                                                                                                                                                                                                                                                                                                                                                                                                                                                                                                                                                                                                                                                                                                                                                                                                                                                                                                                                                                                                                                            |                                                                                                                                                                                                                                                                                                                                                                                                                                                                                                                                                                                                                                                                                                                                                                                                                                                                                                                                                                                                                                                                                                                                                                                                                                                                                                                                                                                                                                                                                                                                                                                                                                                                                                                                                                                                                                                                                                                                                                                                                                                                                                                                                                                                                                                                                                                                                                                                                                                                                                                                                                                                                                                                                                                                                                                                                                                                                                                                                                                                                                                                                                                                                                                                                                                                                                                                                                                                                                                                                                                                                                                                                                                                                                                                                                                                                                                                                                                                                                                                                                                                                                                                                                                                                                                                                                                                                                                                                                                                                                                                                                                                                                                                                                                                                                                                                                                                                                                                                                                                                             | Richard S. Lee, MD                                            |                        |                                 |                                          |                            |                     |                  |                     |                   |                   |                    |                   |                   |                   |             |                                     |                     |                        |                                          |                      |                        |                    |               |                          |                       |                  |                    |                    |  |  |                                      |                     |                     |                                |                          |                     |                  |                          |                   |                                      |                    |                           |                                 |                              |                             |                                            |                        |                     |                 |                      |                        |                             |                    |  |                         |  |  |                                     |                       |                      |                             |                 |                     |                           |                     |                       |                  |                  |                        |                  |                 |                    |                                         |                               |                                   |                                  |                                     |                            |                           |                    |                          |                                  |                     |                          |                             |                          |                        |                         |                    |                 |                                    |                          |                                                               |                         |                                          |                                   |                    |                                     |                   |                             |  |                   |                     |  |                   |                  |  |                     |                      |  |                    |                  |  |                     |                       |  |                       |               |  |                  |
| Jayoung Kim, PhD                                                                                                                                                                                                                                                                                                                                                                                                                                                                                                                                                                                                                                                                                                                                                                                                                                                                                                                                                                                                                                                                                                                                                                                                                                                                                                                                                                                                                                |                                                                                                                                                                                                                                                                                                                                                                                                                                                                                                                                                                                                                                                                                                                                                                                                                                                                                                                                                                                                                                                                                                                                                                                                                                                                                                                                                                                                                                                                                                                                                                                                                                                                                                                                                                                                                                                                                                                                                                                                                                                                                                                                                                                                                                                                                                                                                                                                                                                                                                                                                                                                                                                                                                                                                                                                                                                                                                                                                                                                                                                                                                                                                                                                                                                                                                                                                                                                                                                                                                                                                                                                                                                                                                                                                                                                                                                                                                                                                                                                                                                                                                                                                                                                                                                                                                                                                                                                                                                                                                                                                                                                                                                                                                                                                                                                                                                                                                                                                                                                                             | Monisha Sachdev, BS                                           |                        |                                 |                                          |                            |                     |                  |                     |                   |                   |                    |                   |                   |                   |             |                                     |                     |                        |                                          |                      |                        |                    |               |                          |                       |                  |                    |                    |  |  |                                      |                     |                     |                                |                          |                     |                  |                          |                   |                                      |                    |                           |                                 |                              |                             |                                            |                        |                     |                 |                      |                        |                             |                    |  |                         |  |  |                                     |                       |                      |                             |                 |                     |                           |                     |                       |                  |                  |                        |                  |                 |                    |                                         |                               |                                   |                                  |                                     |                            |                           |                    |                          |                                  |                     |                          |                             |                          |                        |                         |                    |                 |                                    |                          |                                                               |                         |                                          |                                   |                    |                                     |                   |                             |  |                   |                     |  |                   |                  |  |                     |                      |  |                    |                  |  |                     |                       |  |                       |               |  |                  |
| Jennifer Van Eyk, PhD                                                                                                                                                                                                                                                                                                                                                                                                                                                                                                                                                                                                                                                                                                                                                                                                                                                                                                                                                                                                                                                                                                                                                                                                                                                                                                                                                                                                                           |                                                                                                                                                                                                                                                                                                                                                                                                                                                                                                                                                                                                                                                                                                                                                                                                                                                                                                                                                                                                                                                                                                                                                                                                                                                                                                                                                                                                                                                                                                                                                                                                                                                                                                                                                                                                                                                                                                                                                                                                                                                                                                                                                                                                                                                                                                                                                                                                                                                                                                                                                                                                                                                                                                                                                                                                                                                                                                                                                                                                                                                                                                                                                                                                                                                                                                                                                                                                                                                                                                                                                                                                                                                                                                                                                                                                                                                                                                                                                                                                                                                                                                                                                                                                                                                                                                                                                                                                                                                                                                                                                                                                                                                                                                                                                                                                                                                                                                                                                                                                                             | Keith R. Solomon, PhD                                         |                        |                                 |                                          |                            |                     |                  |                     |                   |                   |                    |                   |                   |                   |             |                                     |                     |                        |                                          |                      |                        |                    |               |                          |                       |                  |                    |                    |  |  |                                      |                     |                     |                                |                          |                     |                  |                          |                   |                                      |                    |                           |                                 |                              |                             |                                            |                        |                     |                 |                      |                        |                             |                    |  |                         |  |  |                                     |                       |                      |                             |                 |                     |                           |                     |                       |                  |                  |                        |                  |                 |                    |                                         |                               |                                   |                                  |                                     |                            |                           |                    |                          |                                  |                     |                          |                             |                          |                        |                         |                    |                 |                                    |                          |                                                               |                         |                                          |                                   |                    |                                     |                   |                             |  |                   |                     |  |                   |                  |  |                     |                      |  |                    |                  |  |                     |                       |  |                       |               |  |                  |
| Wei Yang, PhD                                                                                                                                                                                                                                                                                                                                                                                                                                                                                                                                                                                                                                                                                                                                                                                                                                                                                                                                                                                                                                                                                                                                                                                                                                                                                                                                                                                                                                   |                                                                                                                                                                                                                                                                                                                                                                                                                                                                                                                                                                                                                                                                                                                                                                                                                                                                                                                                                                                                                                                                                                                                                                                                                                                                                                                                                                                                                                                                                                                                                                                                                                                                                                                                                                                                                                                                                                                                                                                                                                                                                                                                                                                                                                                                                                                                                                                                                                                                                                                                                                                                                                                                                                                                                                                                                                                                                                                                                                                                                                                                                                                                                                                                                                                                                                                                                                                                                                                                                                                                                                                                                                                                                                                                                                                                                                                                                                                                                                                                                                                                                                                                                                                                                                                                                                                                                                                                                                                                                                                                                                                                                                                                                                                                                                                                                                                                                                                                                                                                                             | Hanno Steen, PhD                                              |                        |                                 |                                          |                            |                     |                  |                     |                   |                   |                    |                   |                   |                   |             |                                     |                     |                        |                                          |                      |                        |                    |               |                          |                       |                  |                    |                    |  |  |                                      |                     |                     |                                |                          |                     |                  |                          |                   |                                      |                    |                           |                                 |                              |                             |                                            |                        |                     |                 |                      |                        |                             |                    |  |                         |  |  |                                     |                       |                      |                             |                 |                     |                           |                     |                       |                  |                  |                        |                  |                 |                    |                                         |                               |                                   |                                  |                                     |                            |                           |                    |                          |                                  |                     |                          |                             |                          |                        |                         |                    |                 |                                    |                          |                                                               |                         |                                          |                                   |                    |                                     |                   |                             |  |                   |                     |  |                   |                  |  |                     |                      |  |                    |                  |  |                     |                       |  |                       |               |  |                  |
